# Supplementary material for: Engineering cell-fluorescent ion track hybrid detectors
Source: PubMed Central journal article supplement (PMC3699405; doi:10.1186/1748-717x-8-141), 2013-06-11

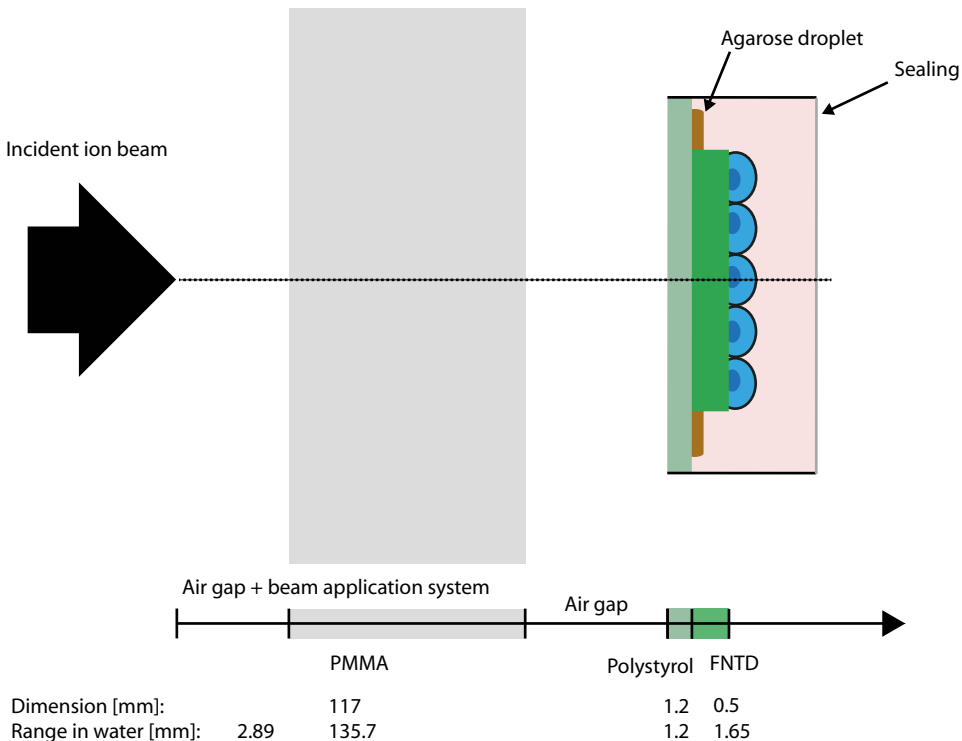

Supplement: 1748-717X-8-141-S1.pdf [file 1748-717X-8-141-S1.pdf]
